# Supplementary material
Source: ML conference proceedings conference paper supplement (https://openaccess.thecvf.com/content/ICCV2023/html/Sun_Neural_Reconstruction_of_ICCV_2023_paper.html)
Supplement: Supplementary file 2 [file Sun_Neural_Reconstruction_of_ICCV_2023_supplemental.zip]

Archive with 2 entries (2 files):
- 03040-supp/03040-supp.pdf
- 03040-supp/demo_video.mp4
